# Supplementary material for: CDK9 and PP2A regulate RNA polymerase II transcription termination and coupled RNA maturation
Source: PubMed Central journal article supplement (PMC9535751; doi:10.15252/embr.202154520), 2022-08-18
Supplement: EMBR-23-e54520-s003.pdf [file EMBR-23-e54520-s003.pdf]

# CDK9 and PP2A regulate RNA polymerase II transcription termination and coupled RNA maturation.

Michael Tellier<sup>1\*</sup>, Justyna Zaborowska<sup>1</sup>, Jonathan Neve<sup>2</sup>, Takayuki Nojima<sup>3</sup>, Svenja Hester<sup>2</sup>, Marjorie Fournier<sup>2</sup>, Andre Furger<sup>2</sup>, Shona Murphy<sup>1\*</sup>

<sup>1</sup> Sir William Dunn School of Pathology, University of Oxford, South Parks Road, Oxford OX1 3RE, UK.

<sup>2</sup> Department of Biochemistry, University of Oxford, South Parks Road, Oxford OX1 3QU, UK.

<sup>3</sup> Medical Institute of Bioregulation, Kyushu University, 3-1-1 Maidashi, Higashi-ku, Fukuoka 812-8582, Japan

\*For correspondence: [michael.tellier@path.ox.ac.uk](mailto:michael.tellier@path.ox.ac.uk) (MT); [shona.murphy@path.ox.ac.uk](mailto:shona.murphy@path.ox.ac.uk) (SM)

## Table of contents

|                                                                                                                                              |    |
|----------------------------------------------------------------------------------------------------------------------------------------------|----|
| <b>Appendix Figure S1.</b> CDK9 inhibition abrogates polyadenylation.....                                                                    | 2  |
| <b>Appendix Figure S2.</b> Inhibition of a CDK9 analog sensitive (as) cell line produces similar results to the current CDK9 inhibitors..... | 4  |
| <b>Appendix Figure S3.</b> CDK9 phosphorylates several transcription and splicing factors <i>in vivo</i> .....                               | 6  |
| <b>Appendix Figure S4.</b> PP1 and PP2A regulates transcription of protein-coding genes.....                                                 | 8  |
| <b>Appendix Figure S5.</b> CDK9 and PP2A regulate mRNA cleavage and polyadenylation.....                                                     | 10 |
| <b>Appendix Table S1:</b> List of antibodies used in mNET-seq, ChIP, co-immunoprecipitation, and western blots                               | 12 |
| <b>Appendix Table 2:</b> List of primers used for ChIP-qPCR and qRT PCR                                                                      | 13 |

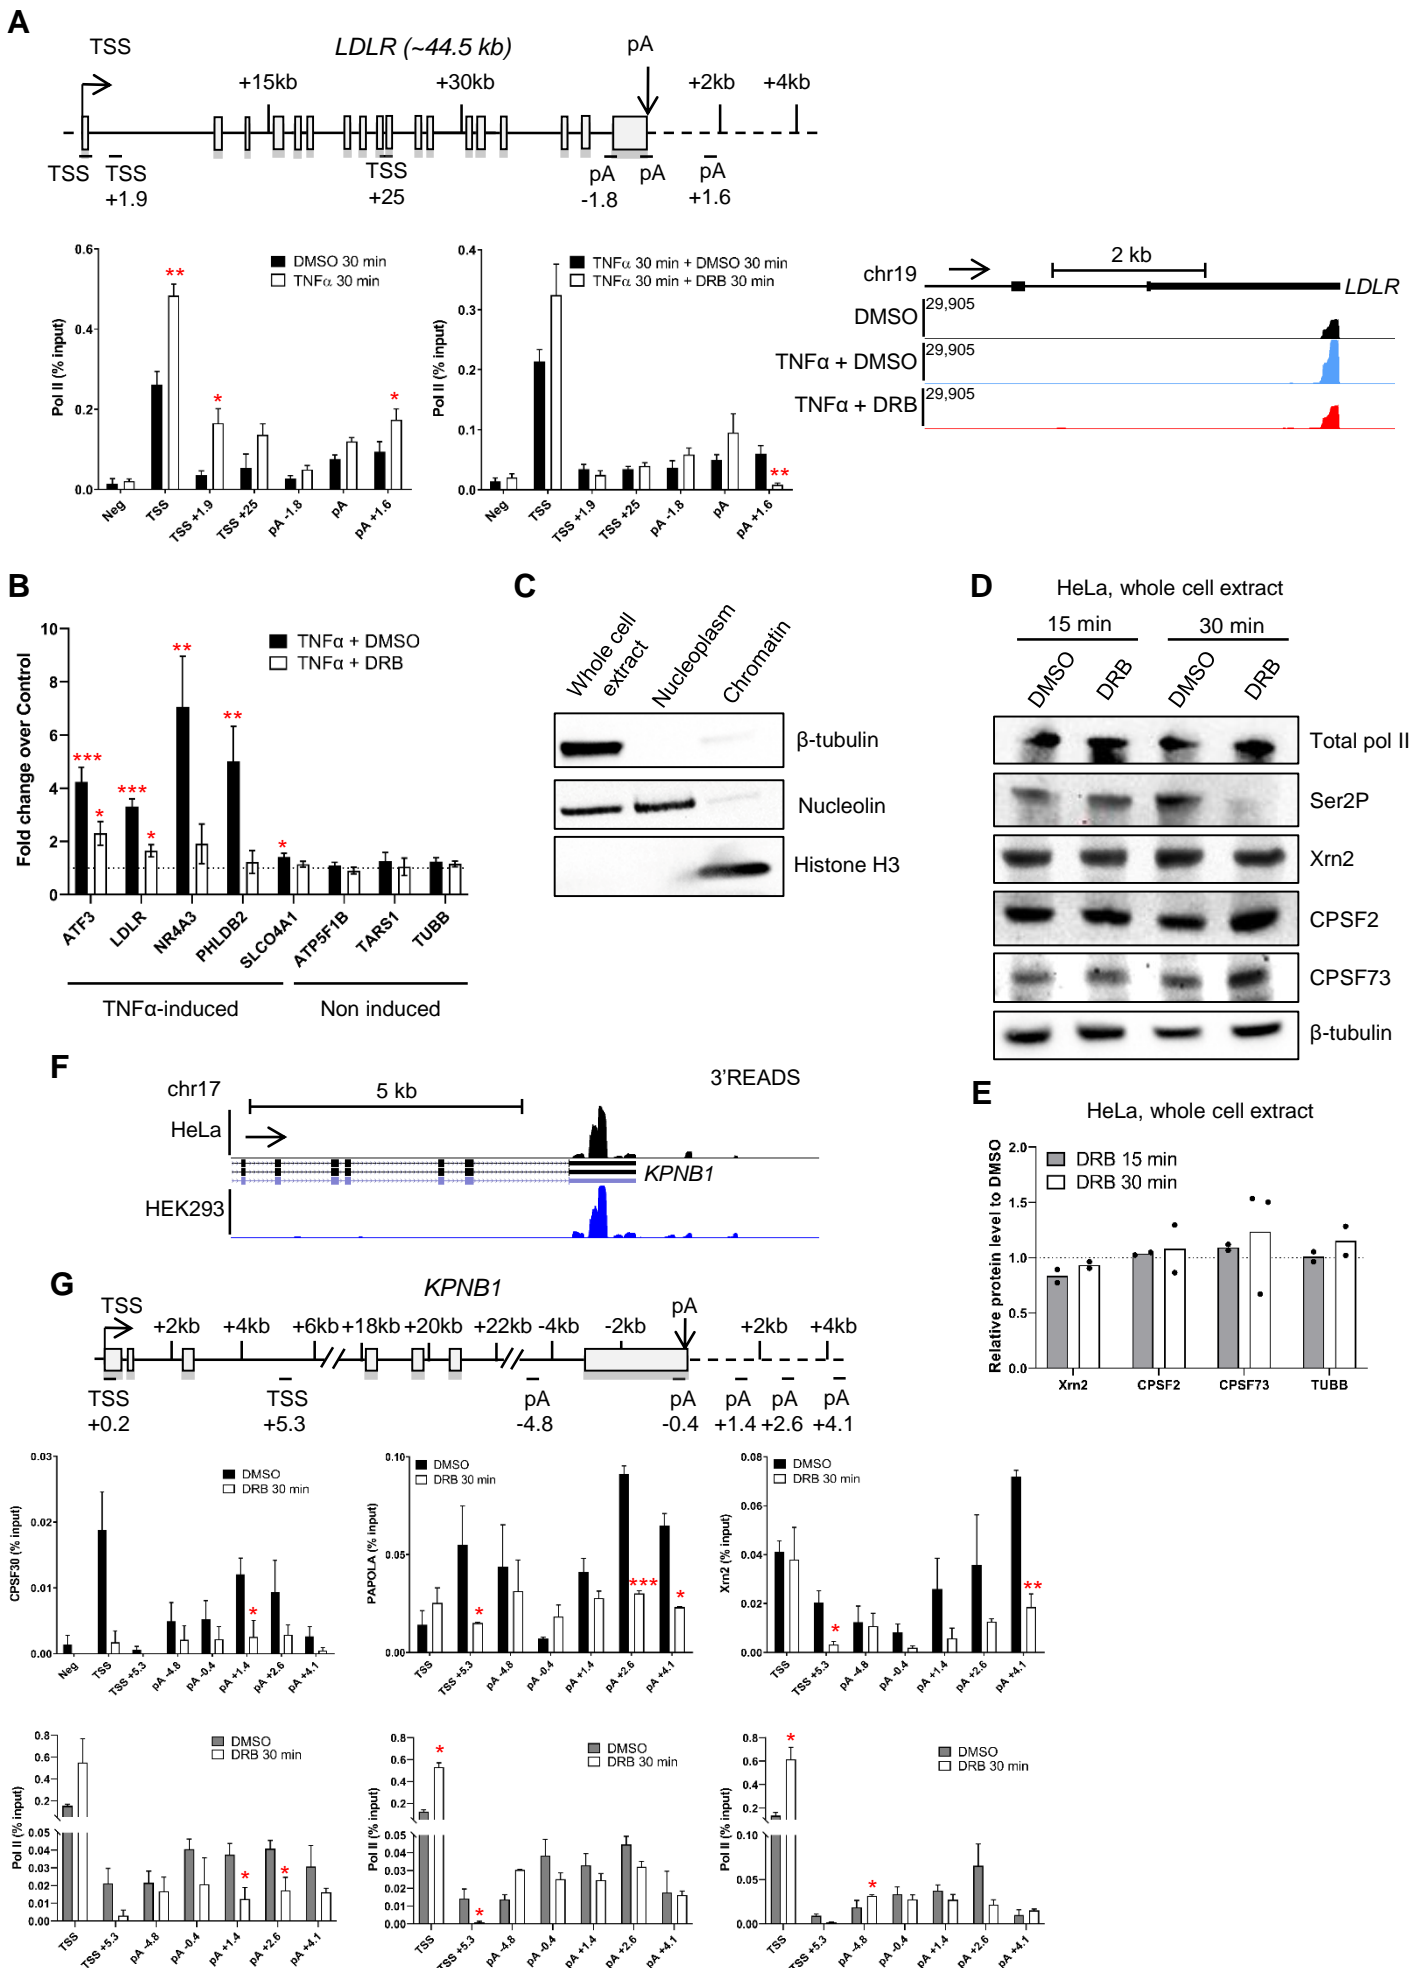

## **Appendix Figure S1: CDK9 inhibition abrogates polyadenylation.**

**A.** Pol II ChIP-qPCR on the TNF $\alpha$ -induced gene LDLR and screenshot of the genome browser track of the 3'READS experiments for this gene. n=3 biological replicates, mean  $\pm$  SEM, p-value: \* p < 0.05, \*\* p < 0.01. Statistical test: two-tailed unpaired t test. **B.** qRT-PCR of nuclear polyadenylated mRNAs of several TNF $\alpha$ -induced or non-induced genes with a 30 minutes DMSO or a DRB (100  $\mu$ M here and in all other figures unless stated otherwise) treatment. n=5 biological replicates, mean  $\pm$  SEM, p-value: \* p < 0.05, \*\* p < 0.01, \*\*\* p < 0.001. Statistical test: two-tailed unpaired t test. **C.** Western blot of  $\beta$ -tubulin, Nucleolin, and Histone H3 on whole cell extract, nucleoplasm, and chromatin fractions. **D.** Western blot of total pol II, Ser2P, Xrn2, CPSF2, CPSF73, and  $\beta$ -tubulin as a loading control, on whole cell extract. **E.** Quantification of the western blots shown in D. n=2 biological replicates except for CPSF73 DRB 30 min where n=3 biological replicates, mean  $\pm$  SEM. **F.** Screenshot of the genome browser track of the 3'READS experiments for *KPNB1* showing the usage of two poly(A) sites in HEK293 and HeLa cell lines. **G.** ChIP-qPCR of total pol II, CPSF73, PAPOLA, and Xrn2 on *KPNB1*. The CPA factor / total pol II ratios shown in Figure 1F were calculated based on the pol II profile located below each CPA factor ChIP-qPCR profile. n=3 biological replicates, mean  $\pm$  SEM, p-value: \* p < 0.05, \*\* p < 0.01, \*\*\* p < 0.001. Statistical test: two-tailed unpaired t test.

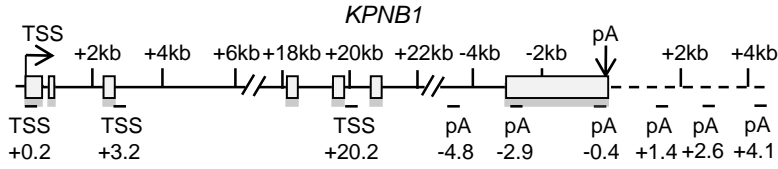

Ser2P ChIP-qPCR  
CDK9<sup>as</sup>

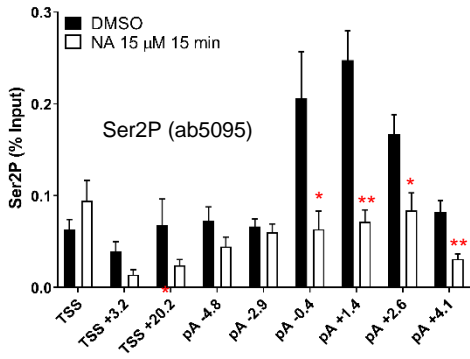

Ser5P ChIP-qPCR  
CDK9<sup>as</sup>

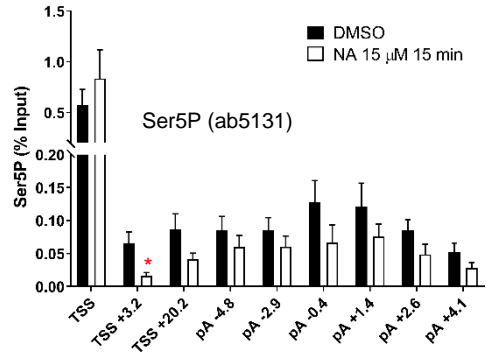

Ser2P (Cell Signalling)

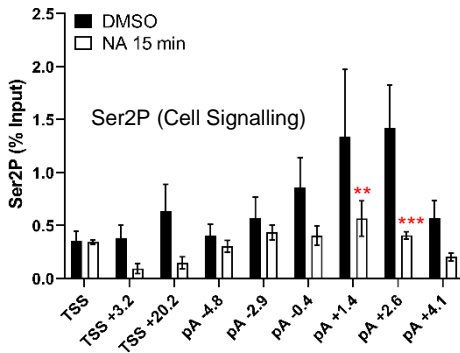

Ser5P (Cell Signalling)

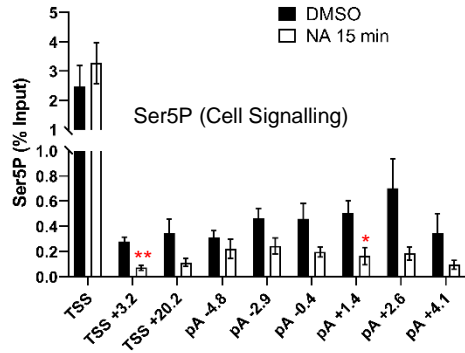

**Appendix Figure S2. Inhibition of analog sensitive CDK9 (as) produces similar results to the current CDK9 inhibitors.**

ChIP-qPCR of Ser2P (Abcam or Cell Signaling), and Ser5P (Abcam or Cell Signaling) in CDK9as cells treated with 15mM 1-NA-PP1 for 15 minutes on *KPNB1*. n=3 biological replicates, mean  $\pm$  SEM, p-value: \* p < 0.05, \*\* p < 0.01, \*\*\* p < 0.001. Statistical test: two-tailed unpaired t test.

**A**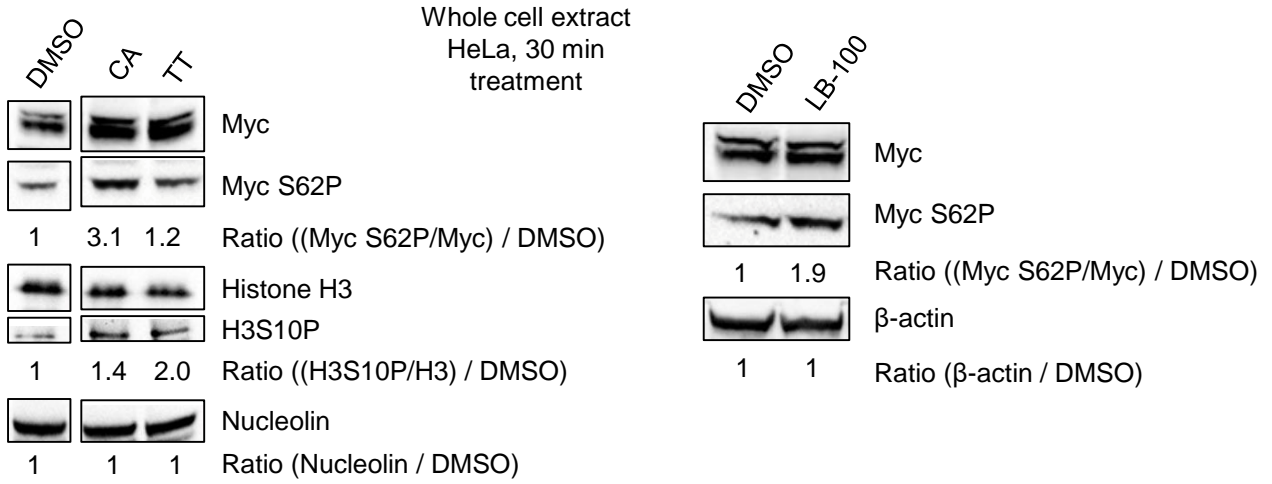**B**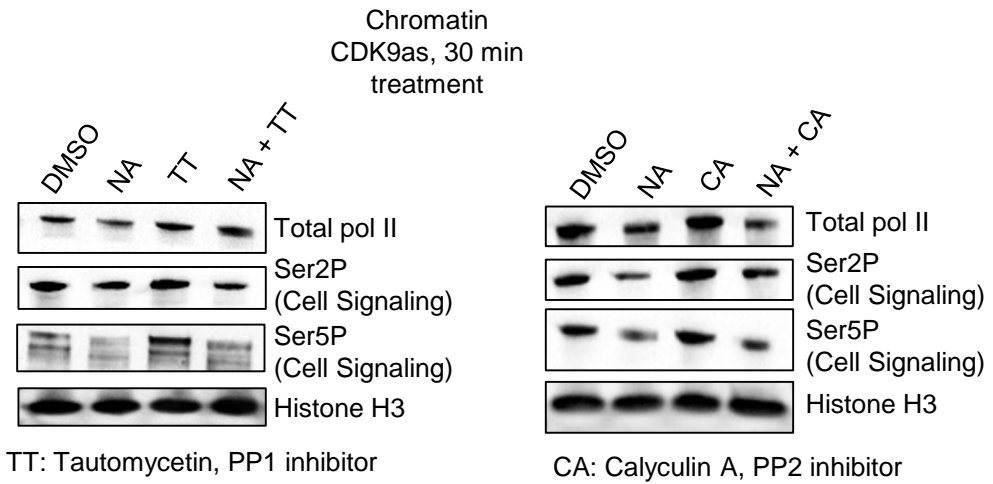**C**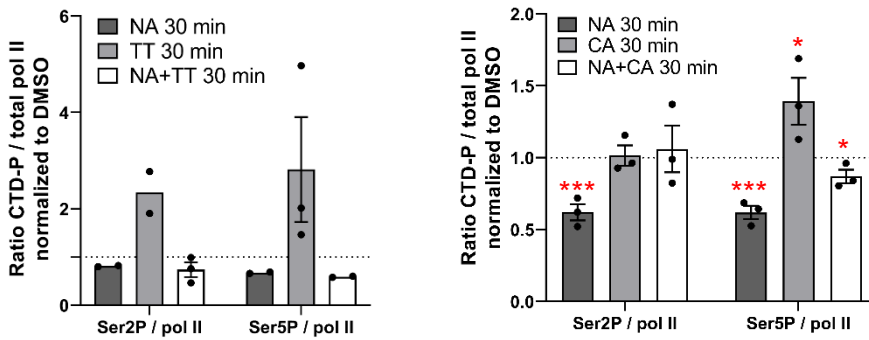

**Appendix Figure S3. CDK9 phosphorylates several transcription and splicing factors *in vivo*.**

**A.** Western blot of Myc, Myc S62P, Histone H3, Histone H3 S10P, and Nucleolin as a loading control, on whole cell extract of HeLa cells treated for 30 minutes with DMSO, DRB, CA, LB-100, or TT. **B.** Western blot of total pol II, Ser2P, Ser5P, and histone H3 as a loading control, on the chromatin fraction of CDK9as cells treated for 30 minutes with DMSO, NA, CA, TT, NA+CA, or NA+TT. The histone H3 loading control (CA samples) is the same as the loading control shown in Figure 4B as the same experiment is shown in two different figures. **C.** Quantification of the western blots shown in B. n=3 biological replicates except for Ser2P / pol II NA and TT and for Ser5P/ pol II NA and NA+TT where n=2 biological replicates, mean  $\pm$  SEM, p-value: \* p < 0.05, \*\*\* p < 0.001. Statistical test: two-tailed unpaired t test.

**A**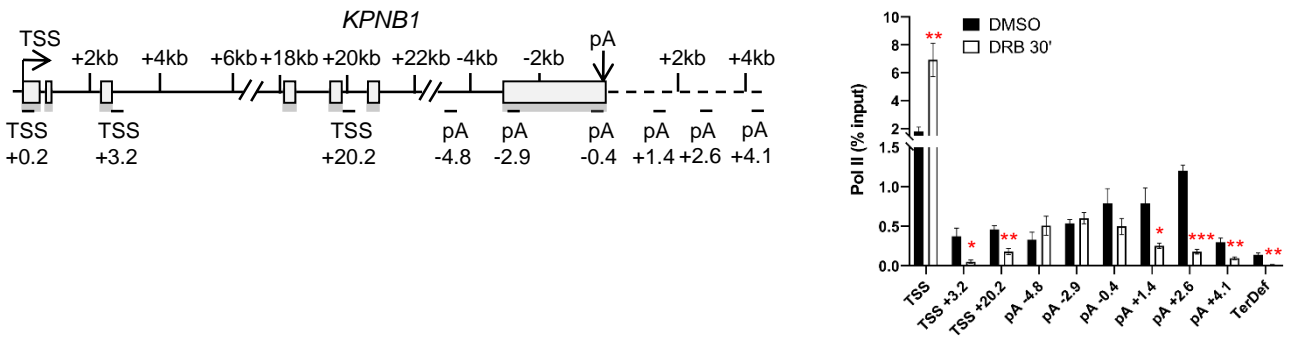**B**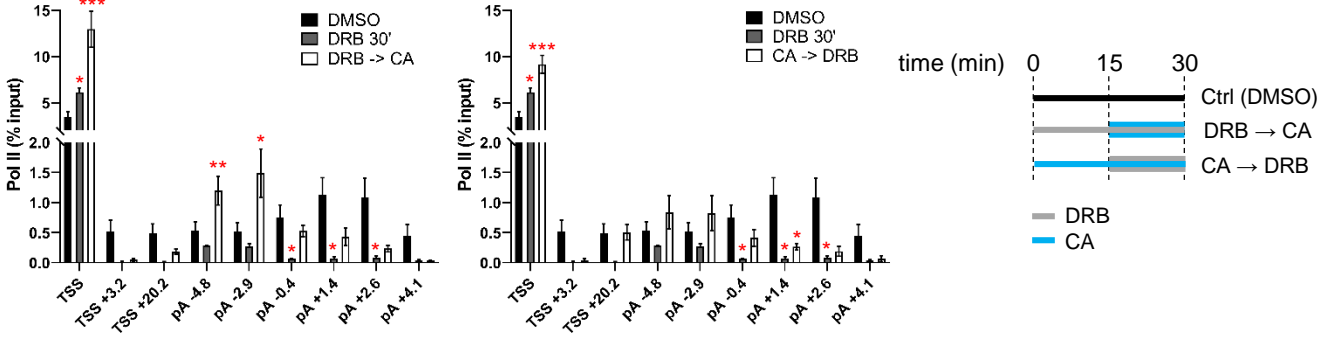**C**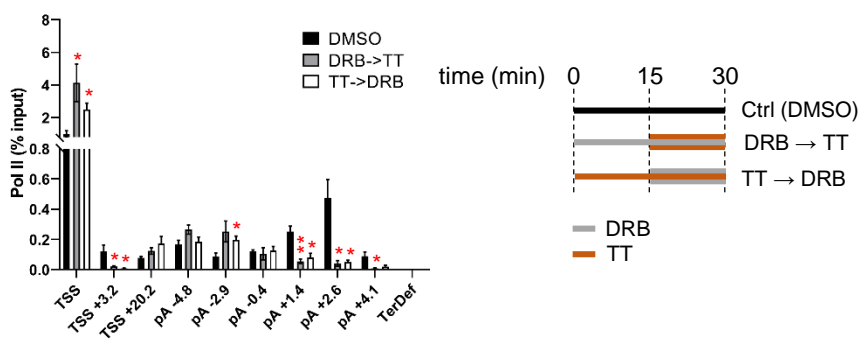



## Appendix Figure S4. PP1 and PP2A regulate transcription of protein-coding genes.

**A.** ChIP-qPCR of total pol II after 30 minutes treatment with DMSO or DRB on *KPNB1*. n=3 biological replicates, mean  $\pm$  SEM, p-value: \*  $p < 0.05$ , \*\*  $p < 0.01$ , \*\*\*  $p < 0.001$ . Statistical test: two-tailed unpaired t test. **B.** ChIP-qPCR of total pol II after 30 minutes treatment with DMSO or DRB, or 15 minutes treatment with DRB or CA followed by another 15 minutes with CA (DRB->CA) or DRB (CA->DRB), respectively, on *KPNB1*. n=3 biological replicates, mean  $\pm$  SEM, p-value: \*  $p < 0.05$ , \*\*  $p < 0.01$ , \*\*\*  $p < 0.001$ . Statistical test: two-tailed unpaired t test. **C.** ChIP-qPCR of total pol II after 30 minutes treatment with DMSO or DRB, or 15 minutes treatment with DRB or TT followed by another 15 minutes with TT (DRB->TT) or DRB (TT->DRB), respectively, on *KPNB1*. n=3 biological replicates, mean  $\pm$  SEM, p-value: \*  $p < 0.05$ , \*\*  $p < 0.01$ , \*\*\*  $p < 0.001$ . Statistical test: two-tailed unpaired t test.

**A**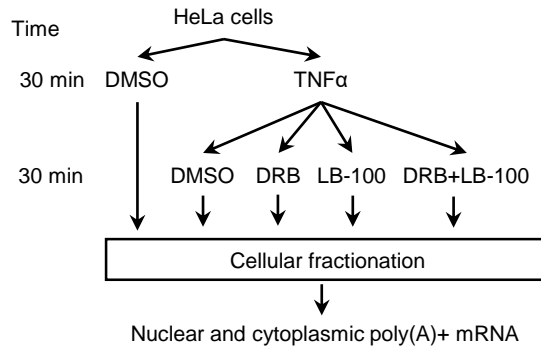**B** Nuclear poly(A)+ mRNAs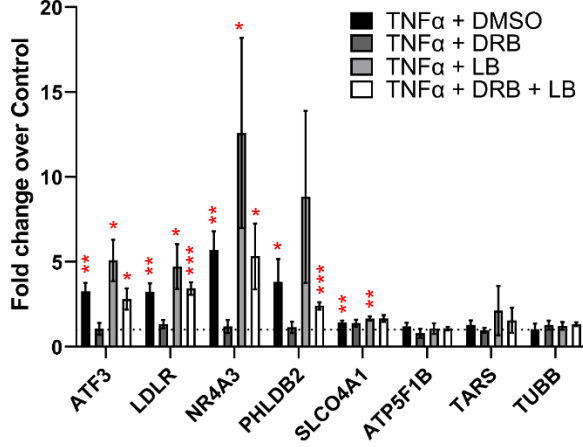**C** Cytoplasmic poly(A)+ mRNAs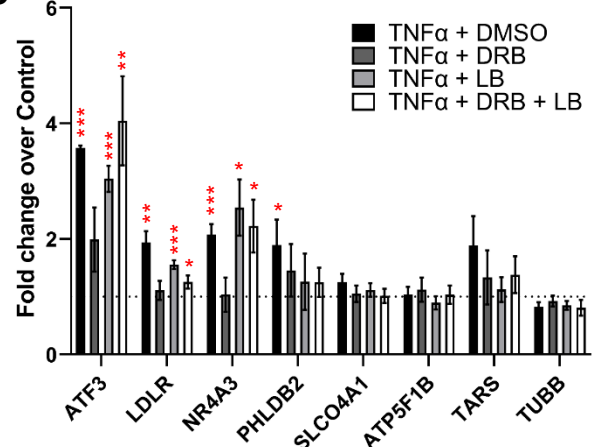**D**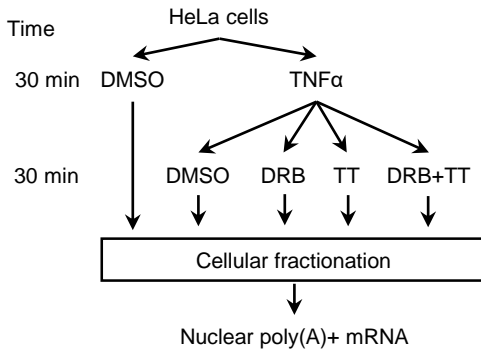**E**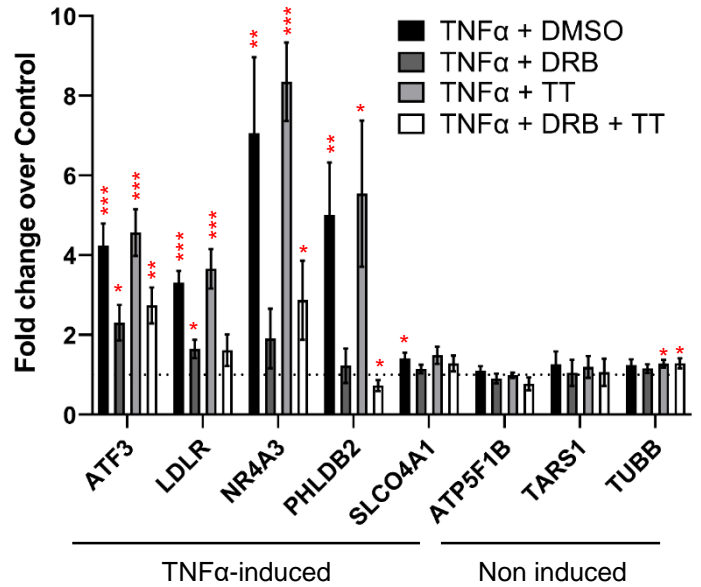

## **Appendix Figure S5. CDK9 and PP2A regulate mRNA cleavage and polyadenylation.**

**A.** Schematic of the nuclear and cytoplasmic qRT-PCR experiments. **B.** qRT-PCR of nuclear polyadenylated mRNAs of several TNF $\alpha$  induced or non-induced genes with a 30 minutes DMSO, DRB, LB, or DRB+LB-100 treatment. n=3 biological replicates, mean  $\pm$  SEM, p-value: \* p < 0.05, \*\* p < 0.01, \*\*\* p < 0.001. Statistical test: two-tailed unpaired t test. **C.** qRT-PCR of cytoplasmic polyadenylated mRNAs of several TNF $\alpha$  induced or non-induced genes with a 30 minutes DMSO, DRB, LB-100, or DRB+LB-100 treatment. n=3 biological replicates, mean  $\pm$  SEM, p-value: \* p < 0.05, \*\* p < 0.01, \*\*\* p < 0.001. Statistical test: two-tailed unpaired t test. **D.** Schematic of the nuclear qRT-PCR experiments. **E.** qRT-PCR of nuclear polyadenylated mRNAs of several TNF $\alpha$  induced or non-induced genes with a 30 minutes DMSO, DRB, TT, or DRB+TT treatment. n=4 biological replicates, mean  $\pm$  SEM, p-value: \* p < 0.05, \*\* p < 0.01, \*\*\* p < 0.001. Statistical test: two-tailed unpaired t test.

**Appendix Table S1:** List of antibodies used in mNET-seq, ChIP, co-immunoprecipitation, and western blots.

| <b>Antibody</b>                                                 | <b>Supplier</b>           | <b>Catalogue number</b> | <b>Applications</b>                        |
|-----------------------------------------------------------------|---------------------------|-------------------------|--------------------------------------------|
| Mouse monoclonal anti-Pol II CTD, Total                         | MBL international         | MABI0601                | mNET-seq                                   |
| Rpb1 NTD (D8L4Y) Rabbit mAb                                     | Cell Signaling Technology | 14958S                  | ChIP, ChIP-seq, Western blot               |
| Phospho-Rpb1 CTD (Ser2) (E1Z3G) Rabbit mAb                      | Cell Signaling Technology | 13499S                  | ChIP, Western blot                         |
| Phospho-Rpb1 CTD (Ser5) (D9N5I) Rabbit mAb                      | Cell Signaling Technology | 13523S                  | ChIP, Western blot                         |
| RNA pol II antibody (mAb)                                       | Active Motif              | 39097                   | Co-immunoprecipitation                     |
| Anti-RNA polymerase II CTD repeat YSPTSPS (phospho S2) antibody | Abcam                     | ab5095                  | Western blot                               |
| Anti-RNA polymerase II CTD repeat YSPTSPS (phospho S5) antibody | Abcam                     | ab5131                  | Western blot                               |
| Rabbit anti-SF3b155/SAP155 Antibody, Affinity Purified          | Bethyl Laboratories       | A300-996A               | Western blot                               |
| SF3b1 T142P                                                     | This study                | /                       | Western blot                               |
| Anti-SAP155 Monoclonal Antibody                                 | MBL international         | D221-3                  | Co-immunoprecipitation                     |
| Rabbit anti-SF3B3 Antibody, Affinity Purified                   | Bethyl Laboratories       | A302-508A               | Western blot                               |
| Myc                                                             | Santa Cruz Biotechnology  | sc-764X                 | Western blot                               |
| Myc S62P                                                        | Abcam                     | ab51156                 | Western blot                               |
| Anti-Cdk9 antibody [EPR3119Y]                                   | Abcam                     | ab76320                 | Western blot                               |
| Cyclin T1 (H-245)                                               | Santa Cruz Biotechnology  | sc-10750                | Western blot                               |
| Rabbit anti-CPSF30 Antibody, Affinity Purified                  | Bethyl Laboratories       | A301-584A               | ChIP, Western blot                         |
| Rabbit anti-CPSF73 Antibody, Affinity Purified                  | Bethyl Laboratories       | A301-091A               | ChIP, Western blot                         |
| Rabbit anti-CPSF100 Antibody, Affinity Purified                 | Bethyl Laboratories       | A301-581A               | ChIP, Co-immunoprecipitation, Western blot |
| Rabbit anti-PAPOLA Antibody, Affinity Purified                  | Bethyl Laboratories       | A301-008A               | ChIP, Western blot                         |
| Rabbit anti-XRN2 Antibody, Affinity Purified                    | Bethyl Laboratories       | A301-103A               | ChIP, Western blot                         |
| Histone H3                                                      | Abcam                     | ab1791                  | Western blot                               |
| Histone H3 S10P                                                 | Life Technologies         | PA517869                | Western blot                               |
| Nucleolin                                                       | Abcam                     | ab22758                 | Western blot                               |
| Beta-actin                                                      | Cell Signaling Technology | 4967S                   | Western blot                               |
| Anti-beta Tubulin antibody - Loading Control                    | Abcam                     | ab6046                  | Western blot                               |
| Normal Rabbit IgG                                               | Cell Signaling Technology | 2729S                   | ChIP, Co-immunoprecipitation               |

**Appendix Table S2:** List of primers used for ChIP-qPCR and qRT-PCR

| Name                   | Forward primer            | Reverse primer          |
|------------------------|---------------------------|-------------------------|
| <b>ChIP primers</b>    |                           |                         |
| KPNB1 TSS              | TTACTTCCTCCCTCCAAATGGG    | ACAGCCTCCCTTCCTTCTTTC   |
| KPNB1 TSS+3.2          | GCCCAGAGAACAAGAAATCG      | GGAATGGACAAGCTGTGTTG    |
| KPNB1 TSS+20.2         | TGCAAGAGCCAGTGGGAACACTT   | CCTCTACTCAGCAATGATACTTC |
| KPNB1 pA-4.8           | CTGAGGAAACTGAAGAACCAAG    | GAAGGCAGTGCTTGCCAGAAT   |
| KPNB1 pA-2.9           | GAGGAGTGTGCACGGATGCTGAA   | CCAAGATGGCCGATGTTATGG   |
| KPNB1 pA-0.4           | TAGTTACCGTCTGCTTGGGAAGATG | CCTCTGACAGCAAGTCCAACATT |
| KPNB1 pA+1.4           | GACTCATCACACCAAGGTCAC     | GATAGTGCTGGGAAGGAAATGG  |
| KPNB1 pA+2.6           | GTACATCTCAGCTTTGGCATATG   | GCCCAGAACATAGCAGGCATTGC |
| KPNB1 pA+4.1           | GTTTCACCGTGTTAGCCAGGATGG  | CCACAGCCATGTTTCATTTCTGC |
| KPNB1 TD               | AGGAGCATGGCTTTTCTCTG      | TCATGCTGGAAGTGGTTGAG    |
| Neg                    | TGGTACAACCACAGCTCAGTG     | AAGCTGGACATGGTTGTGTG    |
| LDLR TSS               | AATCACCCCACTGCAAACCTC     | TAGCTGGAAACCCTGGCTTC    |
| LDLR TSS +1.9          | TGGGATTGCCTGATGAACAC      | AAGGCAGTTCAAAGCTCTCC    |
| LDLR TSS +25           | TTCAGTGTGGTGCTGACAAC      | TTCTCTGCTGGAAACCCAAC    |
| LDLR pA -1.8           | CAGAGAAGACCAAAGCATTGCC    | AATCCCAACCCAAGCCATTG    |
| LDLR pA                | AATCGCCGTGTTACTGTTGC      | TGCCAATCCCTTGTGACATC    |
| LDLR pA +1.6           | GTGATTGTGTTCTCTGCTGTGC    | TCGCACTTAGCACTCAACAG    |
| <b>qRT-PCR primers</b> |                           |                         |
| ATF3                   | AACCACAGTCAGTGGAGAGATG    | TTCTCACAGCTGCAAACACC    |
| LDLR                   | TTTGACGGGACTTCAGTTTC      | TCCCTTGTGACATCTTCACG    |
| NR4A3                  | AAGCCACCAGCTGTTAATGG      | GCAATGCTGTTAGAGGAGCAG   |
| PHLDB2                 | GAAACGACTTCAGGCAAGTCTC    | GCCATGTTTTAGGAAAGAGCAG  |
| SLCO4A1                | TCCTCTTCTTTGCCATAGCC      | ACAAGTTTCCAGGCCATCTG    |
| ATP5F1B                | ACCATTGAAGAAGCTGTGG       | CAATCAAGGCTCTTGTGCAG    |
| TARS1                  | CATGGAAAAGGAGGAACAGC      | CTTTGCCAAACTCCTCCAAG    |
| TUBB                   | ATATGTTCCCTCGTGCCATCC     | TTTGGCCAGTTGTTACCTG     |
| GAPDH                  | CAACGACCACTTTGTCAAGC      | TTCTCTTGTGCTCTTGCTG     |
| EIF1 distal pA         | GCCTGAAACCAAGCAATACC      | GTTCCGGCCATAGTTGTTTG    |
| HCCS distal pA         | CTCGAAAAGCCTGAACAACC      | TCTTGAGCATCACCATGGAC    |
| PCF11 distal pA        | TGGAATTGAACAGCAACCTC      | GAACCCCTTTTGAAGGATG     |
| EIF1 total             | AGGGATCGCTGATGATTACG      | TCTCCATATTCCGGATGCTC    |
| HCCS total             | TGGTGGTGAAGTCAACAAGG      | CCACCAAGCGACTTTCATTC    |
| PCF11 total            | TCCACTCCTCCAATTGTTCC      | AGCTCCAGCTTTTTCTGCTG    |
